# Supplementary material for: Comparative Structural and Functional Analyses of the Fusiform, Oval, and Triradiate Morphotypes of Phaeodactylum tricornutum Pt3 Strain
Source: Front Plant Sci. 2021 Apr 12;12:638181. doi: 10.3389/fpls.2021.638181 (PMC8072121; doi:10.3389/fpls.2021.638181)
Supplement: Supplementary file 1 [file Table_1.XLSX]

## Sheet: oval compared to F+T
up-regulated in Oval Pt3 cells	down-regulated in Oval Pt3 cells
Gene ID (EnsemblProtists)	Description	GOs	Log2FoldChange OT	pvalue OT	Adjusted pvalue OT
Phatr3_J45080|B7FWE3||UPI0001896EB0	kinesin heavy chain-like protein isoform x1	-	-3.25458	5.06825921503119e-16	2.32432724931198e-14
Phatr3_J43879|B5Y4M5	dynactin subunit 4	C:dynactin complex	-3.12621	2.12344047212839e-09	3.84167395507998e-08
Phatr3_J11198|B7FV80	kinesin-like protein kif2c isoform x4	P:microtubule-based movement; F:microtubule binding; F:ATP binding; F:microtubule motor activity; C:kinesin complex	-3.03225	1.16669045310572e-11	2.99442113690821e-10
Phatr3_EG01315	protein	C:microtubule associated complex; F:iron ion binding; F:lipid binding; F:oxidoreductase activity, acting on paired donors, with incorporation or reduction of molecular oxygen, 2-oxoglutarate as one donor, and incorporation of one atom each of oxygen into both donors; F:L-ascorbic acid binding; P:microtubule-based process; P:oxidation-reduction process	-2.69687	1.5229286775941e-06	1.45199775288424e-05
Phatr3_J54534|B7G0C3;Q5G916||UPI0001897373	protein	C:microtubule; P:microtubule-based process; F:structural constituent of cytoskeleton; F:GTP binding; P:protein polymerization; P:GTP catabolic process; F:GTPase activity	-2.38838	5.19784449926707e-13	1.71120726376549e-11
Phatr3_EG00821	hypothetical protein AGDE_05914	C:cytoplasm; C:microtubule; C:plasma membrane; F:GTPase activity; F:structural constituent of cytoskeleton; F:GTP binding; P:neuron migration; P:GTP catabolic process; P:microtubule-based process; P:protein polymerization	-2.37973	0.00291481841509892	0.00970403249506201
Phatr3_J2444|B7G667	kinesin family-like protein	C:cytoplasm; C:kinesin complex; C:microtubule; C:plasmodesma; F:microtubule motor activity; F:ATP binding; F:microtubule binding; P:microtubule-based movement; P:metabolic process; P:cellulose microfibril organization	-2.36123	0.000104660466615281	0.000568047083023857
Phatr3_J46203|B7G0F3	kinesin family-like protein	C:kinesin complex; C:microtubule; F:microtubule motor activity; F:ATP binding; F:microtubule binding; P:microtubule-based movement; P:metabolic process	-2.33287	4.83468880264125e-05	0.000293053472914197
Phatr3_J45552|B7FY27||UPI0001896EC2	kalirin- partial	C:spindle; P:mitotic nuclear division; C:microtubule	-2.24705	6.13042042549035e-05	0.00035979729401985
Phatr3_J32710|B7FSE7	dynactin 62 kda subunit	C:dynactin complex	-2.2302	9.21499268563286e-05	0.000509018643587339
Phatr3_J48134|B7G637||UPI0001897BC7	kinesin-related protein	C:kinesin complex; C:microtubule; F:microtubule motor activity; F:ATP binding; F:microtubule binding; P:microtubule-based movement; P:metabolic process	-2.2271	1.08285907447148e-06	1.06769904742888e-05
Phatr3_J43422|B7FS67||UPI0001896828	tpr repeat-contain kinesin light chain	C:kinesin complex; F:microtubule motor activity; P:signal transduction; P:metabolic process; F:protein binding	-2.13216	9.22491340086242e-06	6.94333176583996e-05
Phatr3_J7359|B7G973	kinesin family-like protein	C:kinesin complex; C:microtubule; F:microtubule motor activity; F:ATP binding; F:microtubule binding; P:microtubule-based movement; P:metabolic process	-2.06051	7.19637945475176e-06	5.57978779217712e-05
Phatr3_J43122|B7FQQ0||UPI00018963A7	protein regulator of cytokinesis 1 isoform x1	F:microtubule binding; P:microtubule cytoskeleton organization; P:cytokinesis	-2.05829	4.21261910228705e-06	3.56280980831025e-05
Phatr3_J42762|B7FPG1||UPI0001896620	protein	C:kinesin complex; F:microtubule motor activity; P:signal transduction; P:metabolic process; F:protein binding	-1.77057	0.000102545102755443	0.000557845358989609
Phatr3_J15853	kinesin family member 11	F:microtubule binding; F:microtubule motor activity; P:microtubule-based movement; F:ATP binding; C:kinesin complex	-1.75032	0.000550004337872808	0.00234848478011948
Phatr3_EG02280|B7G6G4;B7G6G5		F:microtubule binding; F:ATP binding; P:microtubule-based movement; F:microtubule motor activity; C:kinesin complex	-1.74366	0.00161103945843656	0.0058597660228163
Phatr3_J46231|B7G0I8||UPI000189730C	tetratricopeptide repeat protein	C:kinesin complex; F:microtubule motor activity; F:protein serine/threonine kinase activity; F:ATP binding; P:protein phosphorylation; P:signal transduction; F:protein binding	-1.66296	2.81367044791152e-05	0.00018211897560005
Phatr3_EG02239|B7G8A6	kinesin family-like protein	C:kinesin complex; C:microtubule; F:microtubule motor activity; F:ATP binding; F:microtubule binding; F:isomerase activity; P:microtubule-based movement; P:metabolic process	-1.53814	0.00254582402428985	0.00862440486241738
Phatr3_J43493|B7FSE9||UPI0001896679	protein	C:dynactin complex	-1.48199	0.000580248749477417	0.00246428686425585
Phatr3_J17300||B7FNU7	lissencephaly-1 homolog b	C:astral microtubule; C:kinetochore; C:nucleus; C:centrosome; C:microtubule associated complex; C:cell cortex; C:cell leading edge; C:motile primary cilium; C:perinuclear region of cytoplasm; F:1-alkyl-2-acetylglycerophosphocholine esterase activity; F:microtubule binding; F:protein homodimerization activity; F:dynein binding; F:phosphoprotein binding; P:establishment of mitotic spindle orientati…	-1.38591	0.00199195091918035	0.00703125396054353
Phatr3_J13169	kinesin family-like protein	C:kinesin complex; C:microtubule; F:ATP binding; F:microtubule binding; F:minus-end-directed microtubule motor activity; F:starch binding; P:microtubule-based movement; P:metabolic process	-1.38581	0.00258529906468739	0.00873978815239465
Phatr3_J49781|B7GBV7	tetratricopeptide repeat protein	C:nucleus; C:kinesin complex; F:sequence-specific DNA binding transcription factor activity; F:microtubule motor activity; F:ATP binding; F:sequence-specific DNA binding; P:regulation of transcription, DNA-templated; F:protein binding	-0.895267	0.000483396600321903	0.00210277521140028
Phatr3_J46620|B7G1W1||UPI0001897558	dynein light chain roadblock-type	-	1.33204	0.000990415570980723	0.00391363953057847
Phatr3_J33661||B7FTI1	tetratricopeptide protein	C:kinesin complex; P:metabolic process; F:microtubule motor activity; P:intracellular signal transduction; P:signal transduction by phosphorylation; F:sequence-specific DNA binding; P:phosphorylation; C:membrane; F:sequence-specific DNA binding transcription factor activity; F:DNA binding; F:ATP binding; F:kinase activity; P:signal transduction; P:regulation of transcription, DNA-templated; P:pho…	1.77769	1.77652603477794e-06	2.29335217202196e-05
Phatr3_J43024||B7FQD2	mbre tpr repeat protein	C:kinesin complex; P:metabolic process; F:microtubule motor activity; P:signal transduction	2.01151	2.38025188213304e-12	1.14241918325796e-10
Phatr3_J44333	gamma-tubulin complex component 3	C:spindle pole; C:microtubule organizing center; P:microtubule nucleation	2.1597	4.30015903556938e-05	0.00035021817352052
Phatr3_J34196||B7FV01	tetratricopeptide tpr_2	C:kinesin complex; P:metabolic process; F:microtubule motor activity; P:signal transduction	2.97894	9.00369801066105e-22	1.46551496170629e-19
Phatr3_J49102||B7G9H8	tpr repeat-containing protein	C:kinesin complex; P:metabolic process; F:microtubule motor activity; P:signal transduction; F:ATP binding; F:protein kinase activity; F:nucleotide binding; P:protein phosphorylation; F:transferase activity, transferring phosphorus-containing groups; F:protein serine/threonine kinase activity	3.03427	2.57774347963468e-05	0.000228497529753568
Phatr3_J47465||B7G3G7	tpr repeat-containing protein	C:kinesin complex; P:metabolic process; F:microtubule motor activity; F:ADP binding; P:signal transduction	5.0118	3.64196263750815e-05	0.000304563532255056
Phatr3_J46573|Phatr3_J46573.t1||B7G1P6	tpr repeat-contain kinesin light chain	C:kinesin complex; P:metabolic process; F:microtubule motor activity; P:signal transduction; F:ADP binding; F:nucleotide binding; F:nucleoside-triphosphatase activity	5.33102	0.00183347404605838	0.00793516262477134
