# Supplementary material for: Comparative Structural and Functional Analyses of the Fusiform, Oval, and Triradiate Morphotypes of Phaeodactylum tricornutum Pt3 Strain
Source: Front Plant Sci. 2021 Apr 12;12:638181. doi: 10.3389/fpls.2021.638181 (PMC8072121; doi:10.3389/fpls.2021.638181)
Supplement: Supplementary file 2 [file Table_2.XLSX]

## Sheet: oval compared to F+T
up-regulated in Oval Pt3 cells	down-regulated in Oval Pt3 cells
Gene ID (EnsemblProtists)	Description	GOs	Log2FoldChange OT	pvalue OT	Adjusted pvalue OT
Phatr3_J15126||B7G7L4	vacuolar transporter chaperone vtc2	C:integral component of membrane	-3.49725	0.000587659172403327	0.00308555407445618
Phatr3_J43839||B5Y4H9	snare associated golgi	C:membrane	-2.24563	5.78388088588666e-05	0.00044325623440653
Phatr3_J46192||B7G0D4	ankyrin-3-like isoform x1	-	-2.21213	8.41347639631483e-05	0.000606904038373221
Phatr3_EG02518	probable adp-ribosylation factor gtpase-activating protein agd8	F:ARF GTPase activator activity; F:zinc ion binding; P:regulation of ARF GTPase activity; P:positive regulation of GTPase activity	-2.20252	0.000291654551278608	0.00172518226118287
Phatr3_J12157||B7FXZ5	gtpase-activating protein gyp1	F:Rab GTPase activator activity; P:positive regulation of Rab GTPase activity	-2.13216	0.000117588403439802	0.000802330108768178
Phatr3_J43641|Phatr3_J43641.t1||B7FSZ0	vacuolar protein sorting-associated protein 9a-like	P:cellular process; P:single-organism process	-2.06051	0.00010284690743263	0.000716991692970741
Phatr3_J45734||B7FZL6	tbc1 domain family member 24 isoform x1	F:Rab GTPase activator activity; P:positive regulation of Rab GTPase activity	-2.05829	0.00185650245600708	0.00802555007059872
Phatr3_EG00609	nacht and ankyrin domain partial	-	-1.91197	0.000554720208557693	0.00293455612920935
Phatr3_J44656||B7FUU1	rab5 gdp gtp exchange factor-like isoform 2	P:intracellular signal transduction	-1.89749	2.35339396744919e-06	2.9076972110475e-05
Phatr3_J8461|Phatr3_J8461.t1||B7G2Y5	adp-ribosylation factor gtpase-	C:cytoplasm; F:ARF GTPase activator activity; F:zinc ion binding; P:regulation of ARF GTPase activity; P:positive regulation of GTPase activity	-1.88494	0.000613951296586036	0.00320711023811989
Phatr3_J49105||B7G9I3	vesicle transport through interaction with t-snares homolog 1a	P:vesicle-mediated transport; C:membrane; P:intracellular protein transport; F:chitin binding; P:chitin metabolic process; C:extracellular region	-1.85285	0.000132634292114632	0.00088614856320014
Phatr3_J44086||B5Y5A9	protein casp	C:integral component of Golgi membrane; P:intra-Golgi vesicle-mediated transport	-1.79877	0.00218487556988735	0.0091938319690539
Phatr3_J49680|B7GBF5	protein	P:regulation of Rab GTPase activity; P:positive regulation of Rab GTPase activity; F:Rab GTPase activator activity; F:transferase activity; P:DNA-dependent DNA replication; F:DNA binding; P:DNA replication; F:nucleic acid binding; F:nucleotide binding; F:DNA-directed DNA polymerase activity; F:nucleotidyltransferase activity; P:nucleobase-containing compound metabolic process; P:biosynthetic proc…	-1.79409	4.86133276993638e-14	1.82023067512302e-12
Phatr3_EG02242|B7G8H2	brefeldin a-inhibited guanine nucleotide-exchange	P:regulation of ARF protein signal transduction; F:ARF guanyl-nucleotide exchange factor activity; C:integral component of membrane; F:binding	-1.75326	1.50795120971115e-10	3.28583401718276e-09
Phatr3_J49956|B7GCF6||UPI00018983AC	cop1-interactive protein 1	P:regulation of protein import into nucleus; C:vacuolar membrane; C:cytoskeleton; C:vacuole; C:chloroplast; F:protein binding; C:nucleus	-1.7286	0.000260500177645361	0.00123734969967881
Phatr3_J23582|B7GC72	ran binding protein 4-like protein	P:intracellular protein transport; F:Ran GTPase binding	-1.70488	0.00186182130136373	0.00664126308041474
Phatr3_J49955|B7GCF5||UPI000189863C	protein	C:Golgi membrane; P:COPII vesicle coating	-1.57691	0.00133493424775016	0.00501267598203108
Phatr3_J47710|B7G4M2||UPI0001897998	predicted protein	C:Golgi membrane; P:COPII vesicle coating; F:protein binding	-1.55836	4.00631348884318e-07	4.53180699808724e-06
Phatr3_J46522|B7G1I2||UPI000189748F	ras gtpase-activating protein-binding protein 1-like	C:plastid; F:nucleic acid binding; F:protein serine/threonine kinase activity; F:ATP binding; P:protein phosphorylation; P:transport	-1.55775	0.000802776958654083	0.00326407456178526
Phatr3_J43760|B7FTD4	protein	C:clathrin adaptor complex; P:intracellular protein transport; P:vesicle-mediated transport; F:protein binding	-1.51877	1.07405270313822e-11	2.77471431954836e-10
Phatr3_J42002||B7G0A0	protein = RAbX1	C:Golgi apparatus; C:integral component of membrane; P:cellular process	-1.5164	0.000606945537242083	0.00317494426118577
Phatr3_J55141||B7GCY0	exosome complex component rrp42	P:cellular process	-1.47712	0.000433155417471109	0.00239172492311604
Phatr3_EG02518	probable adp-ribosylation factor gtpase-activating protein agd8	F:ARF GTPase activator activity; P:regulation of ARF GTPase activity; F:zinc ion binding	-1.44029	0.000428318538044237	0.00189949960350053
Phatr3_J47212|B7G2V5||UPI00018978D8	protein	P:ER to Golgi vesicle-mediated transport; C:endoplasmic reticulum; C:Golgi apparatus; C:ER to Golgi transport vesicle; P:vesicle-mediated transport; C:cytosol; C:trans-Golgi network; F:molecular_function; C:chloroplast	-1.43741	0.00118095729053822	0.00453230186884471
Phatr3_J9033|B7FRG9	syntaxin 5	C:cell plate; C:membrane; C:intracellular membrane-bounded organelle; F:catalytic activity; F:SNAP receptor activity; F:pyridoxal phosphate binding; P:intracellular protein transport; P:metabolic process; P:vesicle-mediated transport	-1.42731	0.000664322622915307	0.00277355867125403
Phatr3_EG00743	exocyst complex component sec5b-like	C:exocyst; C:cytosol; C:plasma membrane; C:plasmodesma; P:Golgi to plasma membrane transport; P:pollen germination; P:pollen tube growth	-1.40889	2.15406906986155e-05	0.00014440195600341
Phatr3_J12157|B7FXZ5	gtpase-activating protein gyp1	F:Rab GTPase activator activity; P:regulation of Rab GTPase activity	-1.38629	0.000315155869567808	0.00145661103465871
Phatr3_J51169|B7G8Q4	gtp-binding nuclear protein ran	F:GTPase activity; F:GTP binding; P:GTP catabolic process; P:intracellular protein transport; P:nucleocytoplasmic transport; P:small GTPase mediated signal transduction; C:membrane; C:intracellular	-1.34567	8.65309665818499e-13	2.73022505759053e-11
Phatr3_J26299|B7FUR8	transmembrane 9 superfamily member 3-like	C:endosome; C:Golgi medial cisterna; C:cis-Golgi network; C:trans-Golgi network; C:integral component of membrane	-1.32179	0.00127341929834465	0.00482919780064548
Phatr3_J49833|B7GC03||UPI0001898631	adp-ribosylation factor gtpase-activating protein agd14	F:ARF GTPase activator activity; F:zinc ion binding; P:regulation of ARF GTPase activity; P:positive regulation of GTPase activity	-1.30589	0.00217092246901301	0.00754593262437188
Phatr3_J31160|B7GDZ3||UPI00018986DE	ras-like protein rab-11b	C:nucleus; C:vacuole; C:cytosol; C:ribosome; C:plasma membrane; C:cell plate; F:structural constituent of ribosome; F:GTP binding; P:translation; P:small GTPase mediated signal transduction; P:GTP catabolic process; P:intracellular protein transport; F:GTPase activity; P:nucleocytoplasmic transport	-1.28623	6.50783839923096e-06	5.12996295401071e-05
Phatr3_J42858|B7FPT6||UPI00018964FE	exocyst complex component 6	C:exocyst; P:vesicle docking involved in exocytosis	-1.24811	0.000707048074155306	0.00293125186173987
Phatr3_J46545	denn domain-containing protein 4c	F:Rab guanyl-nucleotide exchange factor activity; P:positive regulation of Rab GTPase activity	-1.20232	0.0019693088690274	0.00696171572701886
Phatr3_EG01984|B7G4Y3	clathrin heavy chain	P:intracellular protein transport; P:vesicle-mediated transport; F:structural molecule activity; C:clathrin coat of trans-Golgi network vesicle; C:clathrin coat of coated pit; F:protein binding	-1.17634	0.00203905740584826	0.00717825862124266
Phatr3_J8461|B7G2Y5	adp-ribosylation factor gtpase-	F:ARF GTPase activator activity; P:regulation of ARF GTPase activity; F:zinc ion binding	-1.15559	0.000504416874848662	0.00218217932841293
Phatr3_Jdraft1735|B7S4C6||UPI00018969CA	beta-adaptin-like protein c	C:plasmodesma; C:clathrin adaptor complex; F:protein transporter activity; P:intracellular protein transport; P:vesicle-mediated transport; F:binding	-1.12569	0.000681236860745214	0.00283417529407081
Phatr3_J7988|B7GES2	arf-gap protein	F:ARF GTPase activator activity; F:zinc ion binding; P:regulation of ARF GTPase activity; P:positive regulation of GTPase activity	-0.987688	0.00299447594795455	0.0099134413587572
Phatr3_J54442|B7FY75||UPI000189738F	alpha subunit of tetrameric clathrin adaptor complex ap1	C:integral component of membrane; C:clathrin adaptor complex; F:protein transporter activity; F:oxidoreductase activity, acting on the CH-CH group of donors; P:lipid metabolic process; P:intracellular protein transport; P:vesicle-mediated transport; P:oxidation-reduction process; F:binding	-0.925032	3.42473193901726e-05	0.000217156636133184
Phatr3_J21147	ras-related gtp-binding protein a	C:nucleus; C:cytoplasm; F:GTP binding	-0.922792	5.61243780237753e-05	0.000334036036608305
Phatr3_EG02146|B5Y4G7	vacuolar protein sorting-associated protein 35	C:retromer complex; P:protein transport; P:retrograde transport, endosome to Golgi	-0.822004	0.00145071638996357	0.00536402385189031
Phatr3_J43008|B7FQB5	conserved oligomeric golgi complex subunit 8	C:plasmodesma; C:Golgi transport complex	-0.773408	0.000113434527361635	0.000609794333367951
Phatr3_J51727|B7FVL6||UPI0001896CEF	gtp-binding protein variant	F:GTP binding; P:small GTPase mediated signal transduction; C:intracellular; F:GTPase activity; P:intracellular protein transport; P:nucleocytoplasmic transport; P:GTP catabolic process; C:membrane	0.959638	8.02869689597539e-06	6.14460166061972e-05
Phatr3_J51819||B7FX27	adp-ribosylation factor-like protein 2 isoform x1	C:nucleus; C:mitochondrial intermembrane space; C:centrosome; C:lateral plasma membrane; C:extracellular vesicular exosome; F:GTPase activity; F:signal transducer activity; F:GTPase inhibitor activity; F:protein binding; F:GTP binding; F:GDP binding; P:GTP catabolic process; P:tubulin complex assembly; P:cell cycle; P:small GTPase mediated signal transduction; P:positive regulation of cell-substr…	1.11845	0.00126743162916519	0.00586265429454459
Phatr3_J17885||B7FQV9	transport protein sec61 subunit gamma	C:endoplasmic reticulum membrane; C:integral component of membrane; F:P-P-bond-hydrolysis-driven protein transmembrane transporter activity; P:oocyte growth; P:nematode larval development; P:embryo development ending in birth or egg hatching; P:molting cycle, collagen and cuticulin-based cuticle; P:ovulation; P:protein targeting to ER; P:protein transmembrane transport	1.19901	0.00170603955092124	0.00747873934285578
Phatr3_J48567||B7G7P9	trafficking protein particle complex subunit 6b	-	1.29859	8.34699508662097e-05	0.000604261194477914
Phatr3_J42800||B7FPL5	ankyrin repeat domain protein	-	1.36764	0.00193358887955761	0.00830147819273335
Phatr3_J17683|B7FQ64	vesicle-associated membrane	C:integral component of membrane; P:vesicle-mediated transport	1.38689	0.00127876572090376	0.00484481460446153
Phatr3_J49630||B7GBA1	endosomal cargo receptor	C:integral component of membrane; P:transport	1.45275	0.00227967932360223	0.00949669083211298
Phatr3_J45236||B7FWY0	predicted protein	P:regulation of Rab GTPase activity; P:positive regulation of Rab GTPase activity; F:Rab GTPase activator activity	1.45489	8.59105933827644e-06	8.90915858062629e-05
Phatr3_J45698|B7FYK2	vacuolar protein sorting-associated protein 51 homolog	C:exocyst; F:Rho guanyl-nucleotide exchange factor activity; P:Golgi to plasma membrane transport; P:positive regulation of Rho GTPase activity	1.49246	1.29053515091923e-05	9.28899508094662e-05
Phatr3_J44411|B7FU03	protein	C:cytoplasm; P:exocytosis; P:vesicle docking	1.51413	0.000931795226081743	0.00371087213564429
Phatr3_J9828|B7FSE6	trafficking protein particle complex subunit 2-like isoform x5	C:intracellular; P:ER to Golgi vesicle-mediated transport	1.55183	0.000291834063051821	0.00136158542351307
Phatr3_J9684|B7FSE8	trafficking protein particle complex subunit 2-like	C:intracellular; P:ER to Golgi vesicle-mediated transport	1.61234	0.000186065759054575	0.000929307750584101
Phatr3_J43244|B7FR42	vesicle transport v-snare 13-like	C:endosome; C:plasma membrane; P:protein targeting to vacuole; P:vesicle-mediated transport	1.6595	5.61053594560668e-05	0.000334036036608305
Phatr3_J47899|B7G5A8||UPI00018979BA	adp-ribosylation factor gtpase-	P:regulation of ARF GTPase activity; F:ARF GTPase activator activity; F:zinc ion binding	1.73996	8.3161915307732e-05	0.000467445027040896
Phatr3_J31559|B7FRN5||UPI0001896600	t-snare coiled-coil domain family	C:membrane; P:Golgi vesicle transport; F:protein binding	1.74288	1.96115872845464e-05	0.000132748455807067
Phatr3_J35448|B7FYJ2||UPI000189700B	er membrane protein complex subunit 6	C:ER membrane protein complex	1.81374	0.000308537766692708	0.00142825463830521
Phatr3_J54589	protein transport protein sec61 subunit	C:Golgi apparatus; C:plasma membrane	1.9246	0.000113908114994923	0.000611506722604325
Phatr3_J51511|B7FSB0	canine-like rab-type small g protein	F:GTP binding; P:small GTPase mediated signal transduction; C:membrane; P:GTP catabolic process; C:intracellular; P:intracellular protein transport; P:nucleocytoplasmic transport; F:GTPase activity	1.94798	0.000183981119543849	0.000920393668666145
Phatr3_J17936|B7FR35	vacuolar protein sorting-associated protein 29	C:endosome; C:retromer complex; F:hydrolase activity; P:retrograde transport, endosome to Golgi	1.94887	7.38741955455126e-05	0.000421583677914202
Phatr3_J22713|B7G8A9||UPI0001897E17	ras-like gtp-binding protein ypt1	F:GTP binding; P:small GTPase mediated signal transduction; C:intracellular; F:GTPase activity; P:intracellular protein transport; P:GTP catabolic process; P:nucleocytoplasmic transport; C:membrane	1.95244	0.000145927731936666	0.000758285869246652
Phatr3_J43251||B7FR50	adp-ribosylation factor	C:vacuole; C:plasma membrane; F:GTP binding; P:small GTPase mediated signal transduction; P:response to cadmium ion	1.9899	0.000159398251402667	0.00103860814410719
Phatr3_J13691||B7G253	target snare coiled-coil region domain containing protein	-	1.98994	8.35022147475489e-05	0.000604261194477914
Phatr3_J33914|B7FU79||UPI0001896B6E	trafficking protein particle complex subunit 1	C:cis-Golgi network; P:ER to Golgi vesicle-mediated transport	2.01142	1.54726490041086e-05	0.000108519492007477
Phatr3_J11901	snf7 family protein	P:protein transport; P:vacuolar transport	2.04549	6.73253085661571e-06	5.28595256108009e-05
Phatr3_J54420|B7FXX2||UPI00018973FC	gtp-binding protein sar1	F:GTP binding; P:small GTPase mediated signal transduction; C:intracellular; P:intracellular protein transport	2.05562	8.47944396419212e-06	6.44786510182012e-05
Phatr3_J21198	trafficking protein particle complex subunit 5	-	2.09022	6.18149779581194e-06	4.93852004861897e-05
Phatr3_J44521|B7FUE2||UPI0001896B95	necap-like protein cg9132-like	C:membrane; P:endocytosis	2.15197	2.00914259075594e-07	2.43069275396976e-06
Phatr3_J54935|B7G7W3||UPI0001897D75	ap-2 complex subunit sigma-1	C:Golgi apparatus; C:AP-2 adaptor complex; F:protein transporter activity; F:oxidoreductase activity; F:flavin adenine dinucleotide binding; P:intracellular protein transport; P:oxidation-reduction process	2.16309	0.000163303784339289	0.000833927654856482
Phatr3_J42712|B7FP98||UPI000189657A	ran-specific gtpase-activating protein	P:intracellular transport	2.17401	2.12001717978649e-05	0.000142603998130948
Phatr3_J36149|B7G0I7||UPI00018975C1	sigma1 subunit of ap-1 complex of clathrin-coated vesicles	P:protein transport; F:protein transporter activity	2.19941	0.00017617643409598	0.000887407223594565
Phatr3_J42484|B7FRG2	sft2 domain-containing protein	P:vesicle-mediated transport; C:integral component of membrane	2.19942	4.67734289910357e-06	3.8863989594237e-05
Phatr3_J43950|B5Y4V7||UPI00018205EB	trigger factor	P:protein folding; P:protein transport	2.24178	8.87588547409346e-05	0.000492817817594903
Phatr3_EG02380||B7FT22	er lumen protein retaining receptor	C:integral component of membrane; F:ER retention sequence binding; P:protein retention in ER lumen	2.26795	6.02510153980495e-07	9.09415999988208e-06
Phatr3_J15281||B7G8G4	vacuolar transporter chaperone	C:acidocalcisome	2.27853	1.17645022717088e-10	4.27595873830297e-09
Phatr3_J44412||B7FU04	protein	P:vesicle docking; C:cytoplasm; P:exocytosis	2.31054	2.10757757940636e-06	2.64471550774446e-05
Phatr3_J8659||B7FPR2	adp-ribosylation factor 1	C:Golgi stack; C:plasma membrane; F:GTP binding; P:small GTPase mediated signal transduction; P:response to cadmium ion	2.32889	1.08901354716436e-06	1.49741588675709e-05
Phatr3_J3656||B7GCI4	lrr-gtpase of the roco family	F:GTP binding; P:small GTPase mediated signal transduction; F:nucleotide binding; C:intracellular	2.36374	9.71427592027956e-09	2.42986710157371e-07
Phatr3_J5904|B7G8B8	vacuolar protein sorting-associated protein 2 homolog 1-like	P:vacuolar transport	2.42856	6.40496197468901e-07	6.73631200751292e-06
Phatr3_EG00583	syntaxin	P:small GTPase mediated signal transduction; P:positive regulation of Ras GTPase activity; F:Ras GTPase activator activity; C:intracellular	2.52698	1.16635697473898e-06	1.59359552108193e-05
Phatr3_J52200|B7G3S9	twin arginine targeting family	F:protein transporter activity; P:protein transport	2.65928	2.33435020717995e-05	0.000154820805220589
Phatr3_J36633|B7G1W8||UPI000189755B	ankyrin repeat	F:metal ion binding	2.69423	1.96440075337616e-07	2.3912335096653e-06
Phatr3_J51810|B7FWX9||UPI0001896E30	rab family gtpase	P:small GTPase mediated signal transduction; F:GTP binding; C:intracellular; P:nucleocytoplasmic transport; P:intracellular protein transport; F:GTPase activity; P:GTP catabolic process; C:membrane	2.74756	5.58759494435124e-08	7.67856252979836e-07
Phatr3_J42274|B7G9P1	trafficking protein particle complex subunit 3	-	2.85861	1.45887714797385e-06	1.39881964463748e-05
Phatr3_J19093|B7FUJ7	coatomer subunit epsilon	F:protein binding; P:retrograde vesicle-mediated transport, Golgi to ER; F:structural molecule activity	2.94422	5.60863783114147e-05	0.000334036036608305
Phatr3_J54066|B7FR63||UPI0001896921	vesicle-trafficking protein	P:vesicle-mediated transport; C:integral component of membrane	3.07166	1.90057847441342e-06	1.76097451129676e-05
Phatr3_J38130|B7G511	copia-like retroelement pol polyprotein found-like protein	P:vacuolar transport	3.08372	3.78518781348616e-06	3.2453871166064e-05
Phatr3_J7018|B7G7H3	coatomer subunit zeta-1	P:transport	3.11411	1.01155684037901e-06	1.00662241676741e-05
Phatr3_J31375|B7FXI3	snf7 family protein	P:vacuolar transport	3.19275	3.96207713807743e-08	5.64810803587134e-07
Phatr3_EG02141	vacuolar protein sorting-associated protein 35	C:retromer complex; P:protein transport; P:retrograde transport, endosome to Golgi	3.25958	1.91411230330631e-09	3.50584779763471e-08
Phatr3_J8659|B7FPR2	adp-ribosylation factor 1	F:GTP binding; P:intracellular protein transport; C:intracellular; P:small GTPase mediated signal transduction	3.29765	1.67177068824437e-07	2.08434044081216e-06
Phatr3_J36955|B5Y448||UPI0001820548	trna methyltransferase 112 homolog	C:protein complex; C:extracellular vesicular exosome; F:protein binding; F:protein methyltransferase activity; P:peptidyl-glutamine methylation	3.45734	5.86328386870615e-09	9.78482013180975e-08
Phatr3_J47725|B7G4N9||UPI0001897C12	tropomodulin-1	C:COP9 signalosome; C:membrane; C:myofibril; C:cortical cytoskeleton; F:tropomyosin binding; F:metal ion binding; P:muscle contraction; P:adult locomotory behavior; P:myofibril assembly	3.47813	1.53696977152144e-07	1.9366801210481e-06
Phatr3_J39515|B7G8V6	major facilitator superfamily superfamily protein	C:integral component of membrane; F:transmembrane transporter activity; P:transmembrane transport	3.57623	1.91732311645465e-10	4.11719911322894e-09
Phatr3_J44439|B7FU41||UPI0001896D1E	signal recognition particle 19 kda protein	C:signal recognition particle; P:SRP-dependent cotranslational protein targeting to membrane; F:7S RNA binding	3.65852	1.08183350719126e-08	1.73680516378385e-07
Phatr3_J13922|B7G3G0||UPI0001897789	vesicle transporter got1b-like protein	P:vesicle-mediated transport	3.69966	5.28207722256772e-11	1.25749572831833e-09
Phatr3_J41130|B7GDD3	snare associated golgi family protein	C:integral component of membrane	3.80544	7.51720640049198e-10	1.47257592931492e-08
